# Supplementary material
Source: publisher figshare collection journal article supplement (https://karger.figshare.com/ndownloader/files/6516999)
Supplement: Supplementary file 1 [file 6516999]

## Sheet: DUST Prediction Score
	Outcome prediction with patient characteristics and NCCT
	CT angiography and CT perfusion for prediction of clinical outcome in patients with acute ischemic stroke
	T van Seeters, GJ Biessels, LJ Kappelle, IC van der Schaaf, JW Dankbaar, AD Horsch, et al.
	Patient characteristics
	Age (years)
	Stroke severity (NIHSS)
	Time from symptom onset to scan (hours)
	Pre-admission mRS
	Admission glucose level (mmol/L)
	Treatment with IV-rtPA, intra-arterial thrombolysis, or mechanical thrombectomy
	Non-contrast CT findings
	Hyperdense vessel sign
	ASPECTS or pcASPECTS ≤7
	Predicted risk of poor clinical outcome at 90 days (mRS 3-6)	NA

## Sheet: Blad2
Predictor				Coefficients
NIHSS	NIHSS 1-2	0		Intercept	-6.4812			Predictor
	NIHSS 3-4	0		Age	0.367663		Check	Age	999
	NIHSS 5-7	0		NIHSS 3-4	1.37135			NIHSS	999
	NIHSS 8-13	0		NIHSS 5-7	1.93975			Time	999
	NIHSS >13	0		NIHSS 8-13	2.30443			Pre-admission mRS	999
Pre-admission mRS	0-2	999		NIHSS >13	3.5728			Glucose	999
	3-6			Time from symptom onset to scan	0.0733261			Treatment	999
Treatment with IV-rtPA, intra-arterial thrombolysis, or mechanical thrombectomy	Yes	999		Pre-admission mRS	2.67383			Hyperdense vessel sign	999
	No			Glucose	0.116437			(pc)ASPECTS on NCCT	999
Hyperdense vessel sign	Yes	999		Treatment	-0.320691
	No			Hyperdense vessel sign	0.601413			Check	7992
ASPECTS or pcASPECTS ≤7	Yes	999		ASPECTS or pcASPECTS ≤7	0.867661
	No
Linear predictor	3811.9
Check	7992
